# Supplementary material
Source: MDPI journal article supplement (https://www.mdpi.com/2199-8531/8/4/177)
Supplement: s1 [file s1 › JOItmC-1889442-supplementary.pdf]

**Table S1.** Questions evaluating the variables used in this study.

| Factors                              | Question Codes     | Questions                                                                                                                                                                                                                                                                       |
|--------------------------------------|--------------------|---------------------------------------------------------------------------------------------------------------------------------------------------------------------------------------------------------------------------------------------------------------------------------|
| Collaboration and outsourcing        | actprod_4          | Is this establishment engaged in the production of goods, assembly of parts or delivery of services?                                                                                                                                                                            |
|                                      | actdede_5          | Is this establishment engaged in the design or development of new products or services?                                                                                                                                                                                         |
| Job complexity and autonomy          | teamex_16          | A team is a group of people working together with a shared responsibility for the execution of allocated tasks. Team members can come from the same unit or from different units across the establishment. Do you have any teams fitting this definition in this establishment? |
|                                      | teasin_17_1        | With regard to the employees doing teamwork, do most of them work in a single team or do most of them work in more than one team?                                                                                                                                               |
|                                      | tauton_18_1        | Please think about the tasks to be performed by these teams. Who usually decides how the tasks are distributed within the team?                                                                                                                                                 |
|                                      | supchek_26         | Different establishments use different approaches to manage the way employees carry out their tasks. Which of these two statements best describes the general approach to management at this establishment? Please think about the approach that is used the most by managers.  |
|                                      | compprobs_d_29     | For how many employees in this establishment does their job include finding solutions to unfamiliar problems they are confronted with? Your best estimate is good enough.                                                                                                       |
|                                      | comorg_d_30        | For how many employees in this establishment does their job include independently organising their own time and scheduling their own tasks? Your best estimate is good enough.                                                                                                  |
|                                      | pcwkmach_d_31      | For how many employees at this establishment is the pace of work determined by machines or computers? Your best estimate is good enough.                                                                                                                                        |
|                                      | skillsmatch_d_32_1 | What percentage of employees have the skills that are about right to do the job?                                                                                                                                                                                                |
| Skills requirements and skills match | overskill_d_32_2   | What percentage of employees have a higher level of skills than is needed in their job?                                                                                                                                                                                         |
|                                      | underskill_d_32_3  | What percentage of employees have a lower level of skills than is needed in their job?                                                                                                                                                                                          |
| Training and skill development       | skillch_33         | How quickly do the knowledge and skills needed from the employees in this establishment change?                                                                                                                                                                                 |
|                                      | contr_d_34         | How many employees in this establishment are in jobs that require continuous training? Your best estimate is good enough.                                                                                                                                                       |
|                                      | learnnoneed_d_35   | How many employees in this establishment are in jobs that offer limited opportunities to learn new things? Your best estimate is good enough.                                                                                                                                   |
|                                      | training_36_1      | What are the most important ways through which employees in this establishment can become more skilled at their jobs?                                                                                                                                                           |
|                                      | piadtrain_37       | In 2018, how many employees in this establishment participated in training sessions on the establishment premises or at other locations during paid working time? Your best estimate is good enough.                                                                            |
|                                      | onjob_d_38         | In 2018, how many employees in this establishment have received on-the-job training or other forms of direct instruction in the workplace from more experienced colleagues? Your best estimate is good enough.                                                                  |
|                                      | trainatall_39      | Since the beginning of 2016, has this establishment provided any training to any of its employees?                                                                                                                                                                              |
|                                      | wpsupp_40          | Workload and work schedules can prevent the participation of employees in training activities. Which of the following statements best describes what happens in practice at this establishment?                                                                                 |
|                                      | trski_41_1         | How important is "Ensuring that employees have the skills they need to do their current job" for providing training to employees in this establishment?                                                                                                                         |
|                                      | trflex_41_2        | How important is "Allowing employees to acquire skills they need to do other jobs than their current job. For instance, to allow for job rotation or career advancement." for providing training to employees in this establishment?                                            |

|                                 |                  |                                                                                                                                                                                |
|---------------------------------|------------------|--------------------------------------------------------------------------------------------------------------------------------------------------------------------------------|
| Indirect employee participation | trinn_41_3       | How important is “Increasing the capacity of employees to articulate ideas about improvements to the establishment” for providing training to employees in this establishment? |
|                                 | trmot_41_4       | How important is “Improving employee morale” for providing training to employees in this establishment?                                                                        |
|                                 | emporg_47        | Is the company to which this establishment belongs a member of any employers' organization which participates in the negotiation of collective agreements?                     |
|                                 | canat_48_1       | Are the wages of any employees in this establishment set by a collective agreement negotiated at the national or cross-sectoral level?                                         |
|                                 | casec_48_2       | Are the wages of any employees in this establishment set by a collective agreement negotiated at the sectoral level?                                                           |
|                                 | careg_48_3       | Are the wages of any employees in this establishment set by a collective agreement at the regional level?                                                                      |
|                                 | cacom_48_4       | Are the wages of any employees in this establishment set by a collective agreement negotiated at the establishment or company level?                                           |
|                                 | caocc_48_5       | Are the wages of any employees in this establishment set by a collective agreement negotiated on behalf of employees with a specific occupation?                               |
|                                 | caoth_48_6       | Are the wages of any employees in this establishment set by another type of collective agreement?                                                                              |
|                                 | mmerconfirm_v4_1 | Does Trade union representation exist in this establishment?                                                                                                                   |
|                                 | mmerconfirm_v4_2 | Does Works council exist in this establishment?                                                                                                                                |
|                                 | mmerconfirm_v4_3 | Does Public sector equivalent of works council exist in this establishment?                                                                                                    |
|                                 | mmerconfirm_v4_4 | Does Non-union staff representation exist in this establishment?                                                                                                               |
|                                 | mmerconfirm_v4_5 | Does Non-union staff representative exist in this establishment?                                                                                                               |
|                                 | mmerconfirm_v4_6 | Does Other country-specific bodies exist in this establishment?                                                                                                                |
|                                 | mmerconfirm_v4_7 | Does Other country-specific individuals exist in this establishment?                                                                                                           |
|                                 | mmerconfirm_v4_8 | Does There is no official employee representation exist in this establishment?                                                                                                 |
|                                 | mmerconfirm_v4_9 | Does Trade union representative/shop steward exist in this establishment?                                                                                                      |
|                                 | eratt_50         | How would you describe the general attitude of the employee representation at this establishment? The term establishment' refers to the local site at which you work.          |
|                                 | indir_51_1       | Management prefers to consult with the employee representation                                                                                                                 |
|                                 | indir_51_2       | Management prefers to consult with employees directly                                                                                                                          |
|                                 | indir_51_3       | Management prefers to consult with the employee representation and with employees directly                                                                                     |
|                                 | ertrus_52        | In your opinion, to what extent does management at this establishment trust the employee representation?                                                                       |
| Direct employee participation   | regmee_53_1      | Meetings between employees and their immediate manager used to involve employees in this establishment in how work is organised?                                               |
|                                 | staffme_53_2     | Meetings open to all employees at the establishment used to involve employees in this establishment in how work is organised?                                                  |
|                                 | dissinf_53_3     | Dissemination of information through newsletters, website, notice boards, email etc. used to involve employees in this establishment in how work is organised?                 |
|                                 | somedi_53_4      | Discussions with employees through social media or in online discussion boards used to involve employees in this establishment in how work is organised?                       |
|                                 | eidelay_55       | In your opinion, to what extent does involving employees cause delays in the implementation of changes?                                                                        |
|                                 | eicomp_56        | In your opinion, to what extent does involving employees in work organisation changes give the establishment a competitive advantage?                                          |
|                                 | mmepinorg_57_1   | To what extent have employees directly influenced management decisions in the organisation and efficiency of work processes?                                                   |
|                                 | mmepindism_57_2  | To what extent have employees directly influenced management decisions in dismissals?                                                                                          |

|                         |                  |                                                                                                                                                                                                 |
|-------------------------|------------------|-------------------------------------------------------------------------------------------------------------------------------------------------------------------------------------------------|
|                         | mmepintrain_57_3 | To what extent have employees directly influenced management decisions in training and skill development?                                                                                       |
|                         | mmepintime_57_4  | To what extent have employees directly influenced management decisions in working time arrangements?                                                                                            |
|                         | mmepinpay_57_5   | To what extent have employees directly influenced management decisions in payment schemes?                                                                                                      |
|                         | mmerinorg_58_1   | To what extent has the employee representation influenced management decisions in the organisation and efficiency of work processes?                                                            |
|                         | mmerindism_58_2  | To what extent has the employee representation influenced management decisions in dismissals?                                                                                                   |
|                         | mmerintrain_58_3 | To what extent has the employee representation influenced management decisions in training and skill development?                                                                               |
|                         | mmerintime_58_4  | To what extent has the employee representation influenced management decisions in working time arrangements?                                                                                    |
|                         | mmerinpay_58_5   | To what extent has the employee representation influenced management decisions in payment schemes?                                                                                              |
| Innovation              | innoprod_9       | Since the beginning of 2016, has this establishment introduced any new or significantly changed products or services?                                                                           |
|                         | innoproc_10      | Since the beginning of 2016, has this establishment introduced any new or significantly changed processes either for producing goods or supplying services?                                     |
|                         | innomark_11      | Since the beginning of 2016, has this establishment introduced any new or significantly changed marketing methods?                                                                              |
| Digitalization          | ictcomp_d_19     | How many employees in this establishment use personal computers or laptops to carry out their daily tasks?                                                                                      |
|                         | ictapp_20        | Since the beginning of 2016, did this establishment purchase any software that was specifically developed or customised to meet the needs of the establishment?                                 |
|                         | ictrob_21        | Robots are programmable machines that are capable of carrying out a complex series of actions automatically, which may include the interaction with people. Does this establishment use robots? |
|                         | itprodimp_22     | Does this establishment use data analytics to improve the processes of production or service delivery?                                                                                          |
|                         | itperfmon_23     | Does this establishment use data analytics to monitor employee performance?                                                                                                                     |
|                         | itperfmonuse_24  | Since the beginning of 2016, how would you say the use of data analytics in this establishment has changed?                                                                                     |
| Product market strategy | pmstratlp_65_1   | How important is “offering products or services at lower prices than the competition” for the competitive success of this establishment?                                                        |
|                         | pmstratbq_65_2   | How important is “offering products or services that are of better quality than those offered by the competition” for the competitive success of this establishment?                            |
|                         | pmstartcust_65_3 | How important is “customising products or services to meet specific customer requirements” for the competitive success of this establishment?                                                   |
|                         | pmstratnps_65_4  | How important is “regularly developing products, services or processes that are new to the market” for the competitive success of this establishment?                                           |
| Firm Performance        | prodvol_68       | Since the beginning of 2016, how has the amount of goods or services produced by this establishment changed?                                                                                    |
|                         | profit_69        | In 2018, did this establishment make a profit?                                                                                                                                                  |
|                         | profplan_70      | Did this establishment expect to make a profit in 2018?                                                                                                                                         |
|                         | chempfut_71      | In the next three years, how do you expect the total number of employees in this establishment to change?                                                                                       |
| Employee well-being     | sickleave_59     | Do you think the level of sickness leave in this establishment is too high?                                                                                                                     |
|                         | lowmot_60        | Overall, how motivated do you think employees in this establishment are?                                                                                                                        |
|                         | retainemp_62     | How difficult is it for this establishment to retain employees?                                                                                                                                 |
|                         | qwprel_63        | How would you describe the relations between management and employees in this establishment in general?                                                                                         |

**Table S2.** The output of Genetic Algorithm for the first model.

| Factors            | 68 | 69 | 70 | 71 |
|--------------------|----|----|----|----|
| Population         | 16 | 9  | 5  | 17 |
| actprod_4          | 1  | 1  | 1  | 1  |
| actdede_5          | 1  | 1  | 1  | 1  |
| innoprod_9         | 1  | 1  | 1  | 1  |
| innoproc_10        | 1  | 0  | 1  | 1  |
| innomark_11        | 0  | 1  | 1  | 1  |
| teamex_16          | 1  | 1  | 1  | 1  |
| teasin_17_1        | 1  | 1  | 1  | 1  |
| teasin_17_2        | 0  | 0  | 1  | 1  |
| tauton_18_1        | 1  | 1  | 0  | 1  |
| tauton_18_2        | 1  | 1  | 1  | 1  |
| ictcomp_d_19       | 0  | 0  | 1  | 0  |
| ictapp_20          | 1  | 1  | 1  | 1  |
| ictrob_21          | 1  | 1  | 1  | 1  |
| itprodimp_22       | 1  | 1  | 1  | 1  |
| itperfmon_23       | 1  | 1  | 1  | 1  |
| itperfmonuse_24    | 0  | 1  | 1  | 1  |
| supchek_26         | 1  | 1  | 1  | 1  |
| compprobs_d_29     | 1  | 1  | 0  | 1  |
| comorg_d_30        | 0  | 0  | 0  | 1  |
| pcwkmach_d_31      | 0  | 1  | 1  | 1  |
| skillsmatch_d_32_1 | 0  | 1  | 1  | 1  |
| overskill_d_32_2   | 1  | 1  | 1  | 1  |
| underskill_d_32_3  | 1  | 1  | 1  | 1  |
| skillch_33         | 1  | 1  | 0  | 1  |
| contr_d_34         | 0  | 1  | 1  | 1  |
| learnnoneed_d_35   | 0  | 0  | 1  | 1  |
| training_36_1      | 1  | 1  | 1  | 1  |
| learneach_36_2     | 1  | 1  | 1  | 0  |
| trialerr_36_3      | 0  | 0  | 0  | 0  |
| piadtrain_37       | 1  | 1  | 1  | 1  |
| onjob_d_38         | 0  | 1  | 1  | 1  |
| trainatall_39      | 1  | 1  | 1  | 1  |
| wpsupp_40          | 1  | 1  | 1  | 1  |
| trski_41_1         | 0  | 0  | 1  | 1  |
| trflex_41_2        | 0  | 1  | 1  | 0  |
| trinn_41_3         | 1  | 1  | 0  | 1  |
| trmot_41_4         | 1  | 1  | 1  | 1  |
| emporg_47          | 1  | 1  | 1  | 1  |
| canat_48_1         | 0  | 1  | 1  | 1  |
| casec_48_2         | 0  | 1  | 0  | 1  |
| careg_48_3         | 1  | 0  | 1  | 1  |
| cacom_48_4         | 1  | 1  | 1  | 1  |
| caocc_48_5         | 1  | 0  | 1  | 0  |
| caoth_48_6         | 1  | 1  | 1  | 1  |
| mmerconfirm_v4_1   | 1  | 0  | 1  | 0  |
| mmerconfirm_v4_2   | 1  | 0  | 1  | 0  |
| mmerconfirm_v4_3   | 0  | 0  | 0  | 0  |
| mmerconfirm_v4_4   | 0  | 1  | 1  | 0  |
| mmerconfirm_v4_5   | 1  | 1  | 0  | 0  |
| mmerconfirm_v4_6   | 0  | 1  | 1  | 1  |
| mmerconfirm_v4_7   | 1  | 1  | 1  | 0  |

|                  |          |          |          |          |
|------------------|----------|----------|----------|----------|
| mmerconfirm_v4_8 | 1        | 0        | 0        | 1        |
| mmerconfirm_v4_9 | 1        | 1        | 1        | 1        |
| eratt_50         | 1        | 1        | 0        | 1        |
| indir_51_1       | 0        | 0        | 1        | 1        |
| indir_51_2       | 1        | 1        | 1        | 1        |
| indir_51_3       | 0        | 1        | 1        | 1        |
| ertrus_52        | 1        | 1        | 0        | 1        |
| regmee_53_1      | 1        | 1        | 1        | 0        |
| staffme_53_2     | 0        | 1        | 1        | 1        |
| dissinf_53_3     | 1        | 1        | 1        | 1        |
| somedi_53_4      | 1        | 0        | 0        | 1        |
| eidelay_55       | 0        | 1        | 1        | 1        |
| eicomp_56        | 0        | 1        | 1        | 1        |
| mmepinorg_57_1   | 1        | 1        | 0        | 0        |
| mmepindism_57_2  | 1        | 0        | 1        | 1        |
| mmepintrain_57_3 | 1        | 1        | 0        | 1        |
| mmepintime_57_4  | 1        | 1        | 1        | 0        |
| mmepinpay_57_5   | 1        | 1        | 1        | 1        |
| mmerinorg_58_1   | 1        | 0        | 1        | 1        |
| mmerindism_58_2  | 0        | 1        | 1        | 0        |
| mmerintrain_58_3 | 1        | 1        | 1        | 1        |
| mmerintime_58_4  | 0        | 0        | 0        | 0        |
| mmerinpay_58_5   | 1        | 0        | 1        | 1        |
| pmstratlp_65_1   | 1        | 1        | 1        | 0        |
| pmstratbq_65_2   | 1        | 1        | 1        | 1        |
| pmstartcust_65_3 | 1        | 1        | 1        | 1        |
| pmstratnps_65_4  | 1        | 1        | 1        | 1        |
| Fitness          | 0.082996 | 0.039723 | 0.053418 | 0.077495 |

**Table S3.** The output of Genetic Algorithm for the second model.

| Factors            | GA59 | GA60 | GA62 | GA63 |
|--------------------|------|------|------|------|
| actprod_4          | 1    | 0    | 1    | 0    |
| actdede_5          | 1    | 0    | 1    | 1    |
| innoprod_9         | 1    | 1    | 1    | 1    |
| innoproc_10        | 1    | 1    | 1    | 1    |
| innomark_11        | 0    | 0    | 1    | 1    |
| teamex_16          | 0    | 1    | 0    | 1    |
| teasin_17_1        | 0    | 1    | 1    | 1    |
| teasin_17_2        | 1    | 1    | 1    | 1    |
| tauton_18_1        | 1    | 1    | 1    | 0    |
| tauton_18_2        | 1    | 1    | 1    | 1    |
| ictcomp_d_19       | 0    | 1    | 1    | 1    |
| ictapp_20          | 1    | 0    | 1    | 0    |
| ictrob_21          | 1    | 1    | 1    | 1    |
| itprodimp_22       | 0    | 1    | 1    | 0    |
| itperfmon_23       | 1    | 0    | 1    | 0    |
| itperfmonuse_24    | 1    | 1    | 1    | 1    |
| supchek_26         | 1    | 1    | 1    | 1    |
| compprobs_d_29     | 0    | 1    | 1    | 0    |
| comorg_d_30        | 0    | 1    | 1    | 1    |
| pcwkmach_d_31      | 1    | 1    | 0    | 0    |
| skillsmatch_d_32_1 | 1    | 1    | 1    | 1    |
| overskill_d_32_2   | 0    | 1    | 1    | 0    |
| underskill_d_32_3  | 1    | 1    | 1    | 1    |

|                  |   |   |   |   |
|------------------|---|---|---|---|
| skillch_33       | 0 | 1 | 0 | 1 |
| contr_d_34       | 0 | 1 | 1 | 1 |
| learnnoneed_d_35 | 1 | 1 | 1 | 1 |
| training_36_1    | 1 | 1 | 0 | 0 |
| learneach_36_2   | 0 | 1 | 1 | 1 |
| trialerr_36_3    | 1 | 1 | 1 | 1 |
| piadtrain_37     | 0 | 1 | 1 | 1 |
| onjob_d_38       | 1 | 1 | 1 | 0 |
| trainatall_39    | 0 | 1 | 1 | 1 |
| wpsupp_40        | 1 | 1 | 1 | 1 |
| trski_41_1       | 1 | 1 | 1 | 1 |
| trflex_41_2      | 1 | 0 | 0 | 1 |
| trinn_41_3       | 0 | 0 | 1 | 1 |
| trmot_41_4       | 1 | 1 | 1 | 1 |
| emporg_47        | 1 | 1 | 1 | 1 |
| canat_48_1       | 1 | 1 | 1 | 0 |
| casec_48_2       | 0 | 1 | 1 | 1 |
| careg_48_3       | 1 | 1 | 1 | 1 |
| cacom_48_4       | 1 | 1 | 1 | 0 |
| caocc_48_5       | 0 | 0 | 1 | 1 |
| caoth_48_6       | 1 | 1 | 0 | 0 |
| mmerconfirm_v4_1 | 1 | 1 | 0 | 1 |
| mmerconfirm_v4_2 | 1 | 1 | 1 | 1 |
| mmerconfirm_v4_3 | 1 | 1 | 1 | 0 |
| mmerconfirm_v4_4 | 1 | 1 | 1 | 0 |
| mmerconfirm_v4_5 | 1 | 1 | 1 | 1 |
| mmerconfirm_v4_6 | 1 | 1 | 1 | 1 |
| mmerconfirm_v4_7 | 1 | 1 | 0 | 1 |
| mmerconfirm_v4_8 | 0 | 1 | 0 | 1 |
| mmerconfirm_v4_9 | 0 | 0 | 1 | 1 |
| eratt_50         | 0 | 1 | 1 | 1 |
| indir_51_1       | 1 | 0 | 1 | 1 |
| indir_51_2       | 1 | 1 | 1 | 1 |
| indir_51_3       | 1 | 1 | 1 | 1 |
| ertrus_52        | 1 | 0 | 1 | 1 |
| regmee_53_1      | 1 | 1 | 1 | 1 |
| staffme_53_2     | 1 | 1 | 1 | 1 |
| dissinf_53_3     | 1 | 1 | 0 | 0 |
| somedi_53_4      | 1 | 1 | 1 | 1 |
| eidelay_55       | 1 | 1 | 1 | 0 |
| eicomp_56        | 0 | 0 | 1 | 1 |
| mmepinorg_57_1   | 1 | 1 | 1 | 1 |
| mmepindism_57_2  | 1 | 1 | 1 | 0 |
| mmepintrain_57_3 | 0 | 1 | 0 | 1 |
| mmepintime_57_4  | 1 | 1 | 0 | 1 |
| mmepinpay_57_5   | 1 | 0 | 1 | 0 |
| mmerinorg_58_1   | 1 | 1 | 1 | 1 |
| mmerindism_58_2  | 1 | 0 | 1 | 1 |
| mmerintrain_58_3 | 1 | 1 | 0 | 1 |
| mmerintime_58_4  | 1 | 1 | 1 | 1 |
| mmerinpay_58_5   | 0 | 1 | 0 | 0 |
| pmstratlp_65_1   | 1 | 1 | 1 | 1 |
| pmstratbq_65_2   | 1 | 1 | 1 | 1 |
| pmstartcust_65_3 | 1 | 1 | 0 | 1 |

|                 |          |          |          |          |
|-----------------|----------|----------|----------|----------|
| pmstratnps_65_4 | 1        | 1        | 1        | 1        |
| Fitness         | 0.091839 | 0.148188 | 0.060458 | 0.133854 |

**Table S4.** The output of BART analysis for the first model.

| 68                |          | 69                 |          | 70                 |          | 71                 |          |
|-------------------|----------|--------------------|----------|--------------------|----------|--------------------|----------|
| Factors           | Overall  | Factors            | Overall  | Factors            | Overall  | Factors            | Overall  |
| actprod_4         | 100      | actprod_4          | 100      | actprod_4          | 100      | actprod_4          | 100      |
| actdede_5         | 81.73106 | actdede_5          | 82.67497 | actdede_5          | 77.74664 | actdede_5          | 86.59718 |
| innoprod_9        | 95.41508 | innoprod_9         | 65.94788 | innoprod_9         | 56.78126 | innoprod_9         | 83.24501 |
| innoproc_10       | 80.008   | innomark_11        | 65.11692 | innoproc_10        | 53.75711 | innoproc_10        | 73.43159 |
| teamex_16         | 27.85222 | teamex_16          | 31.05278 | innomark_11        | 59.7221  | innomark_11        | 63.50722 |
| teasin_17_1       | 45.57302 | teasin_17_1        | 47.39655 | teamex_16          | 31.12425 | teamex_16          | 27.29309 |
| tauton_18_1       | 26.11183 | tauton_18_1        | 26.75484 | teasin_17_1        | 40.93218 | teasin_17_1        | 37.79372 |
| tauton_18_2       | 34.86975 | tauton_18_2        | 38.91046 | teasin_17_2        | 35.71371 | teasin_17_2        | 35.67832 |
| ictapp_20         | 46.94251 | ictapp_20          | 42.13605 | tauton_18_2        | 43.36488 | tauton_18_1        | 29.00935 |
| ictrob_21         | 24.42503 | ictrob_21          | 20.87853 | ictcomp_d_19       | 17.01716 | tauton_18_2        | 34.64315 |
| itprodimp_22      | 44.27557 | itprodimp_22       | 33.05176 | ictapp_20          | 46.22208 | ictapp_20          | 48.72362 |
| itperfmon_23      | 42.03774 | itperfmon_23       | 31.56816 | ictrob_21          | 21.04345 | ictrob_21          | 28.99078 |
| supchek_26        | 46.14736 | itperfmonuse_24    | 28.15167 | itprodimp_22       | 34.58693 | itprodimp_22       | 34.50297 |
| compprobs_d_29    | 26.33804 | supchek_26         | 48.24634 | itperfmon_23       | 38.93403 | itperfmon_23       | 39.26202 |
| overskill_d_32_2  | 43.69921 | compprobs_d_29     | 26.14194 | itperfmonuse_24    | 32.44612 | itperfmonuse_24    | 30.32274 |
| underskill_d_32_3 | 43.61052 | pcwkmach_d_31      | 52.13086 | supchek_26         | 46.5804  | supchek_26         | 46.63881 |
| skillch_33        | 15.70021 | skillsmatch_d_32_1 | 10.08883 | pcwkmach_d_31      | 48.78256 | compprobs_d_29     | 23.69243 |
| training_36_1     | 53.47594 | overskill_d_32_2   | 41.13911 | skillsmatch_d_32_1 | 12.95102 | comorg_d_30        | 23.16457 |
| learneach_36_2    | 74.03928 | underskill_d_32_3  | 48.17806 | overskill_d_32_2   | 40.67171 | pcwkmach_d_31      | 52.16469 |
| trialerr_36_3     | 20.673   | skillch_33         | 16.89406 | underskill_d_32_3  | 46.35494 | skillsmatch_d_32_1 | 8.642423 |
| piadtrain_37      | 22.87713 | contr_d_34         | 29.78997 | contr_d_34         | 30.47477 | overskill_d_32_2   | 41.44509 |
| trainatall_39     | 0        | training_36_1      | 52.39551 | learnnoneed_d_35   | 43.33409 | underskill_d_32_3  | 44.81818 |
| wpsupp_40         | 51.54064 | learneach_36_2     | 82.89048 | training_36_1      | 52.41263 | skillch_33         | 13.34    |
| trinn_41_3        | 37.19794 | piadtrain_37       | 23.80974 | learneach_36_2     | 84.85439 | contr_d_34         | 24.3663  |
| trmot_41_4        | 33.18506 | onjob_d_38         | 19.57604 | piadtrain_37       | 23.08622 | learnnoneed_d_35   | 46.66904 |
| emporg_47         | 46.62232 | trainatall_39      | 0.962945 | onjob_d_38         | 20.72627 | training_36_1      | 52.45171 |
| careg_48_3        | 25.23958 | wpsupp_40          | 50.09639 | trainatall_39      | 3.383251 | piadtrain_37       | 20.95255 |
| cacom_48_4        | 40.64708 | trflex_41_2        | 48.2414  | wpsupp_40          | 48.49063 | onjob_d_38         | 16.8323  |
| caocc_48_5        | 15.25844 | trinn_41_3         | 35.59872 | trski_41_1         | 11.71155 | trainatall_39      | 0        |
| caoth_48_6        | 16.78758 | trmot_41_4         | 33.79973 | trflex_41_2        | 49.13495 | wpsupp_40          | 50.39637 |
| mmerconfirm_v4_1  | 5.741471 | emporg_47          | 43.53909 | trmot_41_4         | 34.14316 | trski_41_1         | 8.005312 |
| mmerconfirm_v4_2  | 4.674785 | canat_48_1         | 7.664852 | emporg_47          | 44.58516 | trinn_41_3         | 36.17782 |
| mmerconfirm_v4_5  | 4.889583 | casec_48_2         | 51.2072  | canat_48_1         | 8.855791 | trmot_41_4         | 30.22282 |
| mmerconfirm_v4_7  | 4.284664 | cacom_48_4         | 40.3024  | careg_48_3         | 23.93178 | emporg_47          | 44.04494 |
| mmerconfirm_v4_8  | 4.588789 | caoth_48_6         | 18.27886 | cacom_48_4         | 40.71512 | canat_48_1         | 10.45092 |
| mmerconfirm_v4_9  | 0.405478 | mmerconfirm_v4_4   | 2.286905 | caocc_48_5         | 11.51011 | casec_48_2         | 50.29894 |
| eratt_50          | 16.9765  | mmerconfirm_v4_5   | 2.506914 | caoth_48_6         | 17.33897 | careg_48_3         | 23.96034 |
| indir_51_2        | 17.71727 | mmerconfirm_v4_6   | 2.630973 | mmerconfirm_v4_1   | 2.106131 | cacom_48_4         | 40.82402 |
| ertrus_52         | 12.07712 | mmerconfirm_v4_7   | 3.364913 | mmerconfirm_v4_2   | 1.38701  | caoth_48_6         | 19.07289 |
| regmee_53_1       | 12.89746 | mmerconfirm_v4_9   | 0        | mmerconfirm_v4_4   | 1.327864 | mmerconfirm_v4_6   | 22.13812 |
| dissinf_53_3      | 37.51638 | eratt_50           | 18.95998 | mmerconfirm_v4_6   | 0        | mmerconfirm_v4_8   | 22.99116 |
| somedi_53_4       | 40.83305 | indir_51_2         | 15.60016 | mmerconfirm_v4_7   | 2.877963 | mmerconfirm_v4_9   | 4.615413 |
| mmepinorg_57_1    | 23.66102 | indir_51_3         | 19.12884 | mmerconfirm_v4_9   | 1.445177 | eratt_50           | 20.13231 |
| mmepindism_57_2   | 52.21266 | ertrus_52          | 10.58394 | indir_51_1         | 16.09013 | indir_51_1         | 14.71594 |
| mmepintrain_57_3  | 26.23115 | regmee_53_1        | 13.11689 | indir_51_2         | 17.23701 | indir_51_2         | 18.42614 |
| mmepintime_57_4   | 41.57095 | staffme_53_2       | 39.98859 | indir_51_3         | 18.22149 | indir_51_3         | 19.07698 |

|                  |          |                  |          |                  |          |                  |          |
|------------------|----------|------------------|----------|------------------|----------|------------------|----------|
| mmepinpay_57_5   | 46.65374 | dissinf_53_3     | 38.68913 | regmee_53_1      | 14.70977 | ertrus_52        | 18.55547 |
| mmerinorg_58_1   | 15.13977 | eidelay_55       | 43.00208 | staffme_53_2     | 39.22845 | staffme_53_2     | 38.54072 |
| mmerintrain_58_3 | 14.64999 | eicomp_56        | 28.25573 | dissinf_53_3     | 37.19203 | dissinf_53_3     | 37.3873  |
| mmerinpay_58_5   | 17.23796 | mmepinorg_57_1   | 20.898   | eidelay_55       | 44.64619 | somedi_53_4      | 46.2054  |
| pmstratlp_65_1   | 36.42186 | mmepintrain_57_3 | 26.58171 | eicomp_56        | 41.18455 | eidelay_55       | 44.17222 |
| pmstratbq_65_2   | 50.87524 | mmepintime_57_4  | 39.99619 | mmepindism_57_2  | 47.21151 | eicomp_56        | 21.92445 |
| pmstartcust_65_3 | 49.56594 | mmepinpay_57_5   | 41.37925 | mmepintime_57_4  | 39.53275 | mmepindism_57_2  | 50.54944 |
| pmstratnps_65_4  | 35.07745 | mmerindism_58_2  | 19.16052 | mmepinpay_57_5   | 44.63911 | mmepintrain_57_3 | 28.43456 |
|                  |          | mmerintrain_58_3 | 15.55651 | mmerinorg_58_1   | 16.34346 | mmepinpay_57_5   | 45.23528 |
|                  |          | pmstratlp_65_1   | 33.80177 | mmerindism_58_2  | 17.79291 | mmerinorg_58_1   | 17.25242 |
|                  |          | pmstratbq_65_2   | 43.57065 | mmerintrain_58_3 | 16.02208 | mmerintrain_58_3 | 17.95518 |
|                  |          | pmstartcust_65_3 | 48.44708 | mmerinpay_58_5   | 16.63355 | mmerinpay_58_5   | 19.25436 |
|                  |          | pmstratnps_65_4  | 32.42823 | pmstratlp_65_1   | 35.03653 | pmstratbq_65_2   | 53.12276 |
|                  |          |                  |          | pmstratbq_65_2   | 46.49195 | pmstartcust_65_3 | 51.26628 |
|                  |          |                  |          | pmstartcust_65_3 | 47.14645 | pmstratnps_65_4  | 37.53383 |
|                  |          |                  |          | pmstratnps_65_4  | 32.82267 |                  |          |

**Table S5.** The output of BART analysis for the second model.

| 59                 |          | 60                 |          | 62                 |          | 63                 |          |
|--------------------|----------|--------------------|----------|--------------------|----------|--------------------|----------|
| Factors            | Overall  | Factors            | Overall  | Factors            | Overall  | Factors            | Overall  |
| actprod_4          | 100      | innoprod_9         | 63.4328  | actprod_4          | 100      | actdede_5          | 100      |
| actdede_5          | 84.19672 | innoproc_10        | 58.37657 | actdede_5          | 80.19182 | innoprod_9         | 80.53177 |
| innoprod_9         | 72.37308 | teamex_16          | 26.84224 | innoprod_9         | 65.85115 | innoproc_10        | 74.50729 |
| innoproc_10        | 67.92973 | teasin_17_1        | 34.98222 | innoproc_10        | 63.25355 | innomark_11        | 72.82593 |
| teasin_17_2        | 42.96708 | teasin_17_2        | 30.8271  | innomark_11        | 61.09079 | teamex_16          | 34.80814 |
| tauton_18_1        | 26.47895 | tauton_18_1        | 18.05178 | teasin_17_1        | 42.96994 | teasin_17_1        | 47.69036 |
| tauton_18_2        | 45.86665 | tauton_18_2        | 29.2567  | teasin_17_2        | 37.08964 | teasin_17_2        | 42.3095  |
| ictapp_20          | 50.94773 | ictcomp_d_19       | 22.10609 | tauton_18_1        | 23.14979 | tauton_18_2        | 47.52991 |
| ictrob_21          | 32.86449 | ictapp_20          | 45.93561 | tauton_18_2        | 39.97219 | ictcomp_d_19       | 23.46332 |
| itperfmon_23       | 40.14468 | ictrob_21          | 24.86123 | ictcomp_d_19       | 18.25347 | ictrob_21          | 37.02851 |
| itperfmonuse_24    | 41.38141 | itprodimp_22       | 38.84966 | ictapp_20          | 48.71208 | itperfmonuse_24    | 61.36116 |
| supchek_26         | 46.19056 | itperfmonuse_24    | 38.66087 | ictrob_21          | 23.01627 | supchek_26         | 99.86038 |
| pcwkmach_d_31      | 47.08437 | supchek_26         | 100      | itprodimp_22       | 39.61762 | comorg_d_30        | 36.8744  |
| skillsmatch_d_32_1 | 6.170713 | compprobs_d_29     | 24.40697 | itperfmon_23       | 42.82087 | skillsmatch_d_32_1 | 16.33842 |
| underskill_d_32_3  | 46.15817 | comorg_d_30        | 27.45781 | itperfmonuse_24    | 35.71112 | underskill_d_32_3  | 55.52931 |
| learnnoneed_d_35   | 34.91289 | pcwkmach_d_31      | 45.68236 | supchek_26         | 52.70715 | skillch_33         | 29.58445 |
| training_36_1      | 49.46327 | skillsmatch_d_32_1 | 9.509346 | compprobs_d_29     | 25.35333 | contr_d_34         | 32.48171 |
| trialerr_36_3      | 29.98672 | overskill_d_32_2   | 36.8616  | comorg_d_30        | 26.64791 | learnnoneed_d_35   | 43.37201 |
| onjob_d_38         | 13.90768 | underskill_d_32_3  | 40.15236 | skillsmatch_d_32_1 | 7.288535 | learneach_36_2     | 88.9442  |
| wpsupp_40          | 48.2742  | skillch_33         | 28.89742 | overskill_d_32_2   | 38.02444 | trialerr_36_3      | 29.13472 |
| trski_41_1         | 6.538384 | contr_d_34         | 24.17825 | underskill_d_32_3  | 39.55154 | piadtrain_37       | 29.78522 |
| trflex_41_2        | 46.77125 | learnnoneed_d_35   | 34.08077 | contr_d_34         | 25.6421  | trainatall_39      | 1.67473  |
| trmot_41_4         | 29.85607 | training_36_1      | 47.35797 | learnnoneed_d_35   | 38.71388 | wpsupp_40          | 79.52735 |
| emporg_47          | 44.20091 | learneach_36_2     | 66.826   | learneach_36_2     | 72.39254 | trski_41_1         | 21.08809 |
| canat_48_1         | 15.56247 | trialerr_36_3      | 20.82621 | trialerr_36_3      | 21.21366 | trflex_41_2        | 57.7124  |
| careg_48_3         | 25.5869  | piadtrain_37       | 26.06426 | piadtrain_37       | 24.77673 | trinn_41_3         | 66.2593  |
| cacom_48_4         | 41.30344 | onjob_d_38         | 23.25712 | onjob_d_38         | 20.3599  | trmot_41_4         | 76.79883 |
| caoth_48_6         | 20.72289 | trainatall_39      | 0        | trainatall_39      | 0        | emporg_47          | 49.69069 |
| mmerconfirm_v4_1   | 2.288468 | wpsupp_40          | 55.62887 | wpsupp_40          | 43.42014 | casec_48_2         | 63.70688 |
| mmerconfirm_v4_2   | 0.286786 | trski_41_1         | 20.27999 | trski_41_1         | 12.09652 | careg_48_3         | 41.02768 |
| mmerconfirm_v4_3   | 8.13643  | trmot_41_4         | 54.9836  | trinn_41_3         | 36.37793 | caocc_48_5         | 15.13571 |

|                  |          |                  |          |                  |          |                  |          |
|------------------|----------|------------------|----------|------------------|----------|------------------|----------|
| mmerconfirm_v4_4 | 0.290139 | emporg_47        | 34.21857 | trmot_41_4       | 31.90804 | mmerconfirm_v4_1 | 6.131386 |
| mmerconfirm_v4_5 | 6.835545 | canat_48_1       | 0.96547  | emporg_47        | 34.28257 | mmerconfirm_v4_2 | 7.097088 |
| mmerconfirm_v4_6 | 0        | casec_48_2       | 44.5252  | canat_48_1       | 3.884582 | mmerconfirm_v4_5 | 5.98068  |
| mmerconfirm_v4_7 | 0.010073 | careg_48_3       | 28.51349 | casec_48_2       | 38.67637 | mmerconfirm_v4_6 | 6.493252 |
| indir_51_1       | 10.62868 | cacom_48_4       | 34.04459 | careg_48_3       | 22.37705 | mmerconfirm_v4_7 | 6.116979 |
| indir_51_2       | 13.35158 | caoth_48_6       | 11.25849 | cacom_48_4       | 36.86745 | mmerconfirm_v4_8 | 6.714227 |
| indir_51_3       | 17.36284 | mmerconfirm_v4_1 | 5.047906 | caocc_48_5       | 10.17249 | mmerconfirm_v4_9 | 0        |
| ertrus_52        | 15.92845 | mmerconfirm_v4_2 | 5.011289 | mmerconfirm_v4_2 | 7.183444 | eratt_50         | 36.85631 |
| regmee_53_1      | 12.8267  | mmerconfirm_v4_3 | 5.61111  | mmerconfirm_v4_3 | 7.248964 | indir_51_1       | 18.71779 |
| staffme_53_2     | 40.53191 | mmerconfirm_v4_4 | 4.649519 | mmerconfirm_v4_4 | 6.562373 | indir_51_2       | 20.46782 |
| dissinf_53_3     | 33.91985 | mmerconfirm_v4_5 | 4.194855 | mmerconfirm_v4_5 | 6.683728 | indir_51_3       | 23.20301 |
| somedi_53_4      | 39.23865 | mmerconfirm_v4_6 | 5.461114 | mmerconfirm_v4_6 | 7.369702 | ertrus_52        | 14.31019 |
| eidelay_55       | 39.2717  | mmerconfirm_v4_7 | 4.439352 | mmerconfirm_v4_8 | 6.570903 | regmee_53_1      | 44.28546 |
| mmepinorg_57_1   | 22.46823 | mmerconfirm_v4_8 | 5.035939 | mmerconfirm_v4_9 | 1.054712 | staffme_53_2     | 87.50932 |
| mmepindism_57_2  | 48.83004 | eratt_50         | 26.50627 | eratt_50         | 17.41404 | somedi_53_4      | 41.93341 |
| mmepintime_57_4  | 39.0642  | indir_51_2       | 17.66181 | indir_51_1       | 11.54313 | eicomp_56        | 35.0768  |
| mmepinpay_57_5   | 48.03092 | indir_51_3       | 16.79417 | indir_51_2       | 15.5977  | mmepinorg_57_1   | 49.26378 |
| mmerinorg_58_1   | 14.93412 | regmee_53_1      | 25.57097 | indir_51_3       | 16.81942 | mmepintrain_57_3 | 46.05652 |
| mmerindism_58_2  | 19.17089 | staffme_53_2     | 68.5931  | ertrus_52        | 12.20955 | mmepintime_57_4  | 52.03593 |
| mmerintrain_58_3 | 14.4611  | dissinf_53_3     | 43.89374 | regmee_53_1      | 13.46009 | mmerinorg_58_1   | 18.37601 |
| mmerintime_58_4  | 17.47474 | somedi_53_4      | 30.07573 | staffme_53_2     | 38.78333 | mmerindism_58_2  | 25.67764 |
| pmstratlp_65_1   | 34.1833  | eidelay_55       | 35.89508 | somedi_53_4      | 43.3556  | mmerintrain_58_3 | 18.70073 |
| pmstratbq_65_2   | 49.53538 | mmepinorg_57_1   | 37.84031 | eidelay_55       | 37.99328 | mmerintime_58_4  | 19.33356 |
| pmstartcust_65_3 | 47.00862 | mmepindism_57_2  | 46.00141 | eicomp_56        | 24.86631 | pmstratlp_65_1   | 46.59209 |
| pmstratnps_65_4  | 31.44312 | mmepintrain_57_3 | 41.2005  | mmepinorg_57_1   | 26.41705 | pmstratbq_65_2   | 58.19866 |
|                  |          | mmepintime_57_4  | 39.58067 | mmepindism_57_2  | 41.49587 | pmstartcust_65_3 | 56.48634 |
|                  |          | mmerinorg_58_1   | 14.60733 | mmepinpay_57_5   | 42.58501 | pmstratnps_65_4  | 38.54825 |
|                  |          | mmerintrain_58_3 | 15.33573 | mmerinorg_58_1   | 15.93296 |                  |          |
|                  |          | mmerintime_58_4  | 15.0912  | mmerindism_58_2  | 17.92162 |                  |          |
|                  |          | mmerinpay_58_5   | 16.13855 | mmerintime_58_4  | 17.02217 |                  |          |
|                  |          | pmstratlp_65_1   | 36.85986 | pmstratlp_65_1   | 37.39802 |                  |          |
|                  |          | pmstratbq_65_2   | 45.40823 | pmstratbq_65_2   | 51.81533 |                  |          |
|                  |          | pmstartcust_65_3 | 42.22401 | pmstratnps_65_4  | 34.88202 |                  |          |
|                  |          | pmstratnps_65_4  | 32.52756 |                  |          |                  |          |
